# Supplementary material
Source: PubMed Central journal article supplement (PMC7061840)
Supplement: ajtr0012-0463-f7.pdf [file ajtr0012-0463-f7.pdf]

# The dose-dependent pleiotropic effects of statin therapy

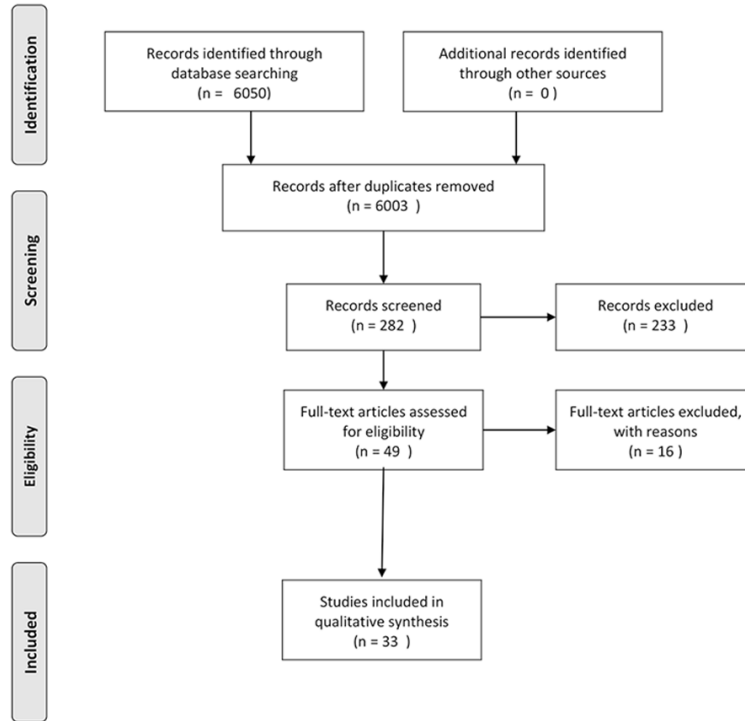

Supplementary Figure 1. Flow chart of study selection.
